# Supplementary material
Source: publisher site journal article supplement (https://www.dovepress.com/article/218584)
Supplement: Supplementary file 1 [file get_supplementary_file.php]

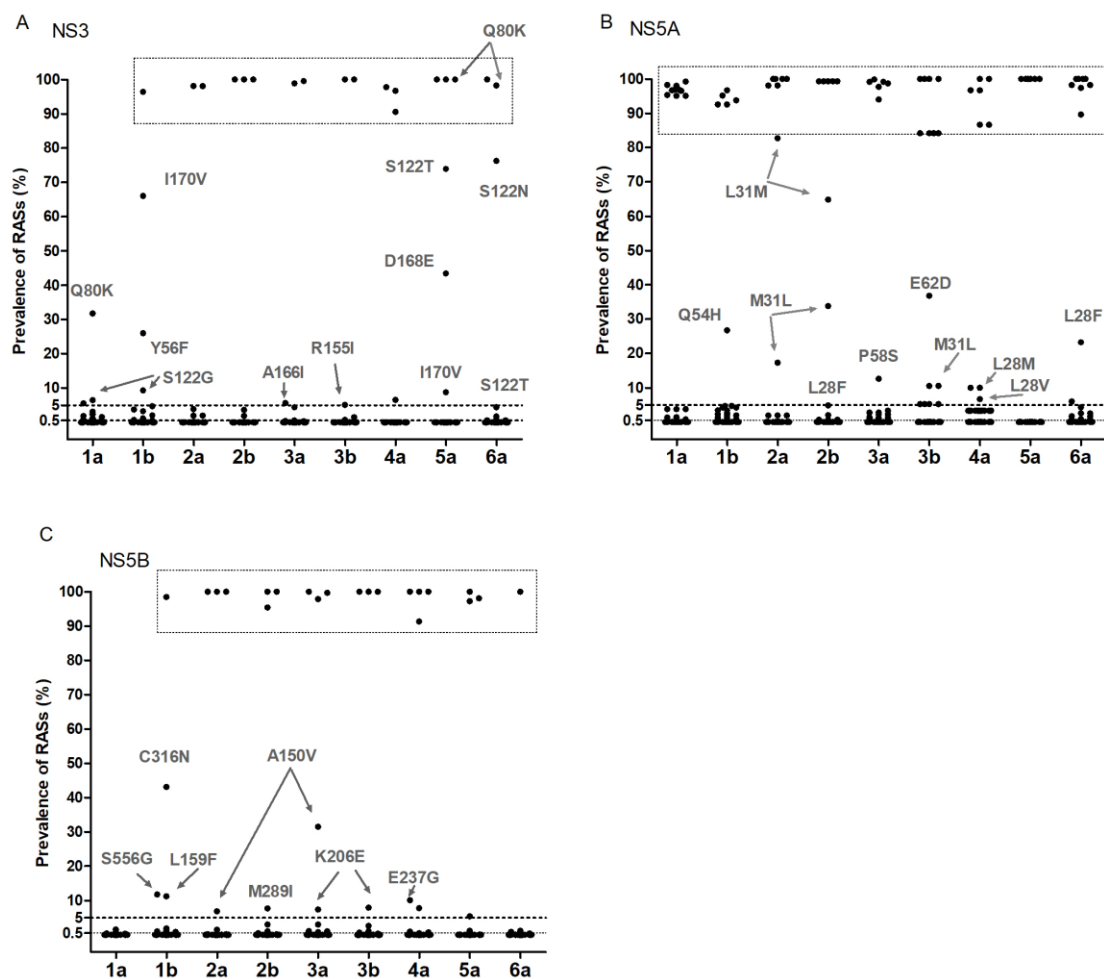

**Supplementary Figure 1** – The distribution of frequencies of naturally occurring RASs in nine subtypes in genes NS3 (A), NS5A (B) and NS5B (C). Each dot represents an RAS.

**Note:** The cluster of RASs in the box with dash line showed prevalence near 100% in the corresponding subtype below. That is because the RASs were determined in other subtypes, and the mutant amino acid is the wild type amino acid in the analyzed subtype.
